# Supplementary material for: Generation of equine enteroids and enteroid-derived 2D monolayers that are responsive to microbial mimics
Source: PubMed Central journal article supplement (PMC8364015; doi:10.1186/s13567-021-00976-0), 2021-08-14

**A**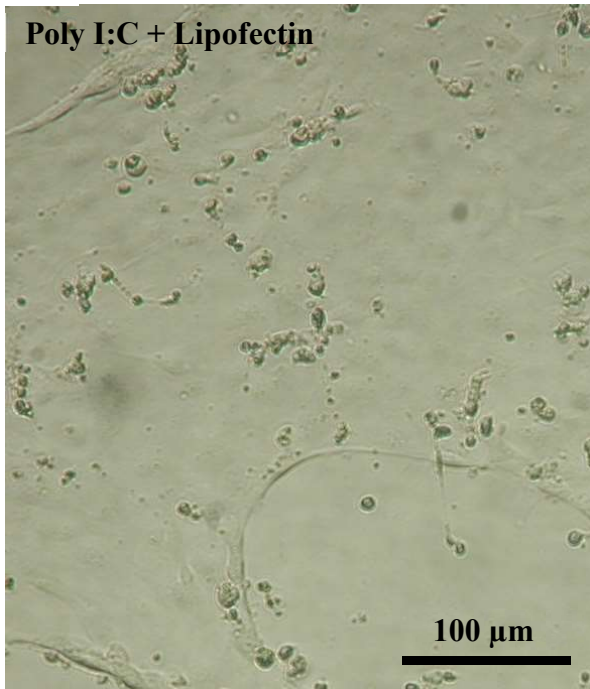**B**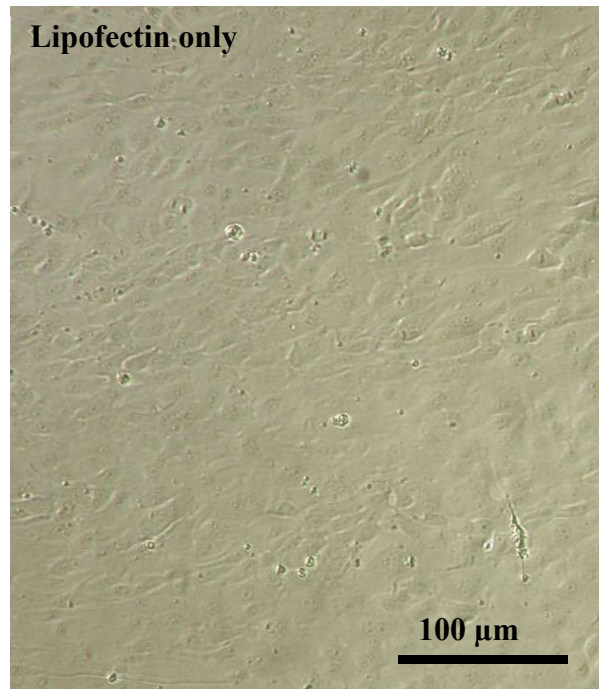**C**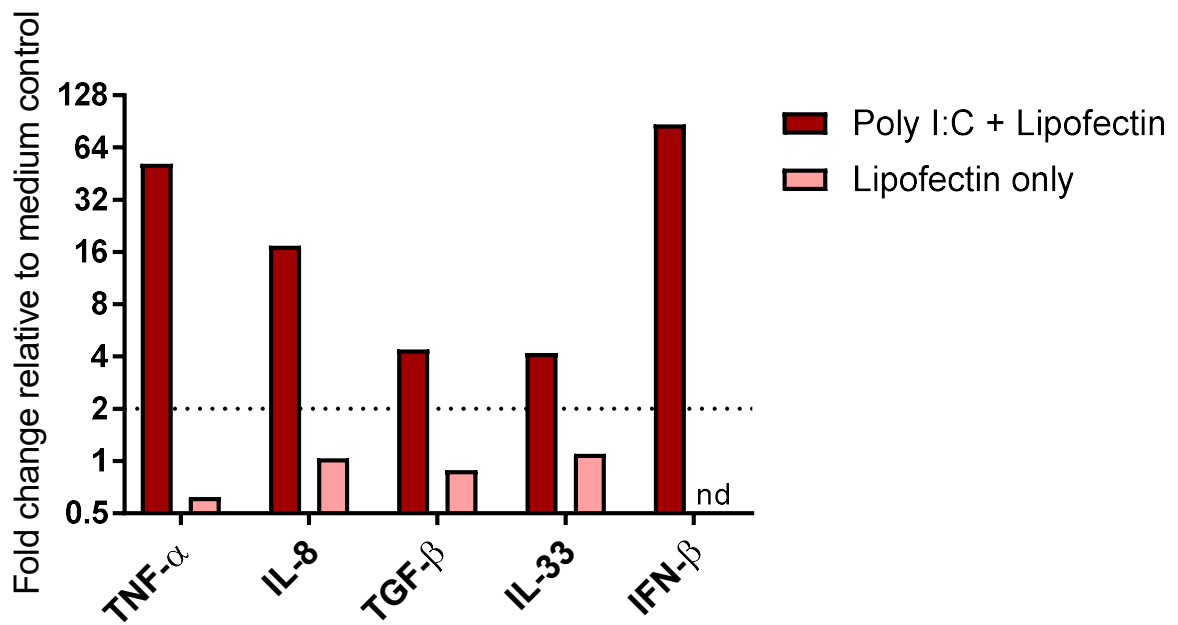

Supplement: 13567_2021_976_MOESM3_ESM.pdf [file 13567_2021_976_MOESM3_ESM.pdf]
